# Supplementary material for: A snapshot of the practicality and barriers to COVID-19 interventions: Public health and healthcare workers’ perceptions in high and low- and middle-income countries
Source: PubMed Central journal article supplement (PMC8612542; doi:10.1371/journal.pone.0260041), 2021-11-24
Supplement: pone.0260041.s001.pdf [file pone.0260041.s001.pdf]

## Supporting Information:

### A snapshot of the practicality and barriers to COVID-19 interventions: public health and healthcare workers' perceptions in high and low and middle-income countries.

Rosanna Glazik<sup>1\*</sup>, Hannah Moore<sup>2</sup>, David Kennedy<sup>3</sup>, Hilary Bower<sup>4</sup>, Hana Rohan<sup>5</sup>, Ashley Sharp<sup>6</sup>, Anna C Seale<sup>7</sup>

<sup>1</sup> UK Public Health Rapid Support Team, Public Health England/London School of Hygiene & Tropical Medicine, London, United Kingdom <sup>2</sup> UK Field Epidemiology Training Programme (FETP), Public Health England, London, UK <sup>3</sup> UK Public Health Rapid Support Team, Public Health England/London School of Hygiene & Tropical Medicine, London, United Kingdom <sup>4</sup> UK Public Health Rapid Support Team, Public Health England/London School of Hygiene & Tropical Medicine, London, United Kingdom, <sup>5</sup> UK Public Health Rapid Support Team, Public Health England/London School of Hygiene & Tropical Medicine, London, United Kingdom <sup>6</sup> UK Public Health Rapid Support Team, Public Health England/London School of Hygiene & Tropical Medicine, London, United Kingdom <sup>7</sup> Department of Infectious Disease Epidemiology, London School of Hygiene & Tropical Medicine, London, United Kingdom.

## Contents

|                                                                                               |    |
|-----------------------------------------------------------------------------------------------|----|
| S1 Table. Implementation of non-pharmaceutical interventions (NPIs) .....                     | 3  |
| S2 Table. Practicality of implementing non-pharmaceutical interventions (NPIs).....           | 5  |
| S3 Table. Barriers to implementing travel restrictions .....                                  | 7  |
| S4 Table. Barriers to implementing restrictions on offices, businesses and institutions ..... | 9  |
| S5 Table. Barriers to implementing restrictions on gatherings .....                           | 11 |
| S6 Table. Barriers to implementing individual measures .....                                  | 12 |
| S7 Table. Barriers to implementing contact tracing methods .....                              | 14 |
| S8 Table. Barriers to implementing shielding measures for vulnerable populations.....         | 16 |
| S9 Table. Vaccine implementation and prioritisation of population groups.....                 | 18 |
| S10 Table. Practicality of implementing a COVID-19 vaccine for certain population groups..... | 19 |
| S11 Table. Barriers to implementing a COVID-19 vaccine .....                                  | 21 |

S1 Table. Implementation of non-pharmaceutical interventions (NPIs)

| Percentage of respondents reporting the following interventions implemented                              |                                         |                                                    |              |
|----------------------------------------------------------------------------------------------------------|-----------------------------------------|----------------------------------------------------|--------------|
|                                                                                                          | High-income countries<br>n (%)<br>N=51* | Low and middle-income countries<br>n (%)<br>N=104† | P-value      |
| <b>Individual measures</b>                                                                               | <b>51 (100)</b>                         | <b>101 (97)</b>                                    | <b>0.551</b> |
| Face masks or face coverings                                                                             | 43 (84)                                 | 98 (94)                                            | 0.080        |
| Handwashing                                                                                              | 48 (94)                                 | 98 (94)                                            | 1.000        |
| Physical distancing                                                                                      | 48 (94)                                 | 84 (81)                                            | -            |
| Respiratory etiquette (e.g. covering mouth and nose with a tissue when coughing or sneezing)             | 42 (82)                                 | 75 (72)                                            | 0.233        |
| Temperature monitoring                                                                                   | 12 (24)                                 | 88 (85)                                            | P<0.001      |
| Other                                                                                                    | 2 (1)                                   | 3 (3)                                              | -            |
| Don't know                                                                                               | -                                       | -                                                  | -            |
| <b>Restrictions on gatherings of people</b>                                                              | <b>48 (94)</b>                          | <b>85 (82)</b>                                     | <b>0.097</b> |
| Mass gatherings (e.g. conferences)                                                                       | 47 (92)                                 | 75 (72)                                            | 0.008        |
| Private gatherings at home                                                                               | 35 (69)                                 | 23 (22)                                            | p < 0.001    |
| Private gatherings outside the home (e.g. funerals)                                                      | 41 (80)                                 | 60 (58)                                            | 0.009        |
| Public gatherings outside the home                                                                       | 46 (90)                                 | 66 (65)                                            | p < 0.001    |
| Other                                                                                                    | -                                       | -                                                  | -            |
| Don't know                                                                                               | -                                       | -                                                  | -            |
| <b>Restrictions on in-country (domestic) travel</b>                                                      | <b>27 (53)</b>                          | <b>33 (32)</b>                                     | <b>0.018</b> |
| Curfew (restricted movement at a particular time)                                                        | 5 (10)                                  | 23 (22)                                            | 0.099        |
| Denial or restricted entry into other sub-national areas (e.g. states or provinces)                      | 15 (29)                                 | 19 (18)                                            | 0.171        |
| Non-essential movement restricted (e.g. stay at home order, lockdown)                                    | 14 (28)                                 | 26 (25)                                            | 0.894        |
| Other                                                                                                    | 3 (6)                                   | 3 (3)                                              | -            |
| Suspended or restricted movement within the country (e.g. restricted domestic flights, public transport) | 6 (12)                                  | 20 (19)                                            | 0.347        |
| Don't know                                                                                               | -                                       | -                                                  | -            |
| <b>Restrictions on international travel</b>                                                              | <b>45 (88)</b>                          | <b>72 (69)</b>                                     | <b>0.031</b> |
| Entry restrictions: denial of entry from specific countries or any country                               | 19 (37)                                 | 32% (n=33)                                         | 0.615        |
| Exit restrictions: denial of exit to specific countries                                                  | 5 (10)                                  | 24% (n=25)                                         | 0.059        |
| Suspended or restricted international flights                                                            | 21 (41)                                 | 37% (n=38)                                         | 0.702        |
| International land borders closure (partial or complete)                                                 | 8 (26)                                  | 36 (35)                                            | 0.023        |
| Visa restrictions                                                                                        | 8 (16)                                  | 23 (22)                                            | 0.568        |
| Entry screening and isolation or quarantine                                                              | 39 (77)                                 | 50 (48)                                            | 0.001        |
| Exit screening and isolation or quarantine                                                               | 7 (14)                                  | 29 (28)                                            | 0.079        |
| Suspended or restricted international ferries or ships                                                   | 10 (20)                                 | 18 (17)                                            | 0.898        |
| Other                                                                                                    | -                                       | -                                                  | -            |
| Don't know                                                                                               | -                                       | -                                                  | -            |

|                                                                                      |                |                |              |
|--------------------------------------------------------------------------------------|----------------|----------------|--------------|
| <b>Restrictions on offices, businesses and institutions</b>                          | <b>45 (88)</b> | <b>77 (74)</b> | <b>0.011</b> |
| Bars                                                                                 | 42 (82)        | 50 (48)        | p < 0.001    |
| Conference centres                                                                   | 33 (65)        | 48 (46)        | 0.045        |
| Cultural centres (e.g. museums, libraries)                                           | 28 (55)        | 43 (41)        | 0.155        |
| Entertainment venues (e.g. cinemas)                                                  | 37 (73)        | 56 (54)        | 0.040        |
| Food shops/markets                                                                   | 24 (47)        | 29 (28)        | 0.029        |
| Higher Education Institutions (e.g. universities)                                    | 25 (49)        | 65 (63)        | 0.154        |
| Hotels                                                                               | 21 (41)        | 40 (39)        | 0.880        |
| Offices                                                                              | 28 (55)        | 47 (45)        | 0.334        |
| Places of worship                                                                    | 29 (57)        | 50 (48)        | 0.391        |
| Restaurants                                                                          | 36 (71)        | 47 (45)        | 0.005        |
| Schools (e.g. childcare centres, primary schools, secondary schools)                 | 23 (45)        | 67 (64)        | 0.034        |
| Sports facilities (e.g. clubs, fitness centres, gyms)                                | 36 (71)        | 53 (51)        | 0.032        |
| Other                                                                                | -              | -              | -            |
| Don't know                                                                           | -              | -              | -            |
| <b>Contact tracing</b>                                                               | <b>49 (96)</b> | <b>88 (85)</b> | <b>0.107</b> |
| Physical contact tracing (e.g. conducted by people)                                  | 41 (80)        | 85 (82)        | 1.000        |
| Mobile phone applications (apps) (e.g. Mobile phone global positioning system (GPS)) | 35 (74)        | 47 (45)        | 0.002        |
| Closed-circuit television (CCTV)                                                     | -              | 3 (3)          | -            |
| Electronic tags                                                                      | -              | 6 (6)          | -            |
| Bank card transactions                                                               | -              | 2 (2)          | -            |
| Other                                                                                | -              | 3 (3)          | -            |
| Don't know                                                                           | 3 (6)          | 2 (2)          | -            |

\*Denominator is the total number of public health worker respondents in high-income countries

†Denominator is the total number of public health worker respondents in low and middle-income countries

S2 Table. Practicality of implementing non-pharmaceutical interventions (NPIs)

|                                                                                                                                                                                              | High-income countries<br>n (%) N=51* |                             |            | Low and middle-income countries<br>n (%) N=104† |                             |            | P-value <sup>††</sup> |
|----------------------------------------------------------------------------------------------------------------------------------------------------------------------------------------------|--------------------------------------|-----------------------------|------------|-------------------------------------------------|-----------------------------|------------|-----------------------|
|                                                                                                                                                                                              | Easy or very easy                    | Difficult or very difficult | Don't know | Easy or very easy                               | Difficult or very difficult | Don't know |                       |
| <b>Contact tracing methods</b>                                                                                                                                                               |                                      |                             |            |                                                 |                             |            |                       |
| Closed-circuit television (CCTV)/ electronic tags as contact tracing methods                                                                                                                 | 4 (8)                                | 30 (59)                     | 17 (33)    | 21 (20)                                         | 59 (57)                     | 24 (23)    | 0.105                 |
| Contact tracing methods using peoples' bank card transactions                                                                                                                                | 3 (6)                                | 34 (67)                     | 14 (27)    | 17 (16)                                         | 63 (61)                     | 24 (23)    | 0.166                 |
| Mobile phone contact tracing apps/GPS-based tracing                                                                                                                                          | 15 (29)                              | 31 (61)                     | 5 (10)     | 40 (38)                                         | 58 (56)                     | 6 (6)      | 0.422                 |
| Physical contact tracing methods (e.g. in-person visits, by phone)                                                                                                                           | 8 (16)                               | 43 (84)                     | -          | 31 (30)                                         | 70 (67)                     | 3 (3)      | 0.063                 |
| <b>Travel restrictions</b>                                                                                                                                                                   |                                      |                             |            |                                                 |                             |            |                       |
| Denial or restricted entry into other sub-national areas (e.g. states or provinces)/suspended or restricted movement within the country (e.g. restricted domestic flights, public transport) | 7 (14)                               | 43 (84)                     | 1 (2)      | 33 (32)                                         | 70 (67)                     | 1 (1)      | 0.052                 |
| Entry/exit screening, isolation and quarantine measures in terms of practical challenges?                                                                                                    | 11 (22)                              | 38 (75)                     | 2 (4)      | 36 (35)                                         | 67 (64)                     | 1 (1)      | 0.136                 |
| International entry/exit restrictions                                                                                                                                                        | 11 (22)                              | 39 (76)                     | 1 (2)      | 30 (29)                                         | 72 (69)                     | 2 (2)      | 0.626                 |
| Non-essential movement restrictions (e.g. stay at home order, lockdown)                                                                                                                      | 9 (18)                               | 42 (82)                     | -          | 21 (20)                                         | 82 (79)                     | 1 (1)      | 0.720                 |
| Restrictions on international flights, ferries or ships                                                                                                                                      | 14 (27)                              | 31 (61)                     | 6 (12)     | 44 (42)                                         | 56 (64)                     | 4 (4)      | 0.060                 |
| Visa restrictions (e.g. suspension or restrictions on work or travels visas)                                                                                                                 | 28 (55)                              | 14 (27)                     | 9 (18)     | 58 (56)                                         | 41 (39)                     | 5 (5)      | 0.022                 |
| <b>Individual measures</b>                                                                                                                                                                   |                                      |                             |            |                                                 |                             |            |                       |
| Face masks/ face coverings                                                                                                                                                                   | 23 (45)                              | 27 (53)                     | 1 (2)      | 47 (45)                                         | 56 (54)                     | 1 (1)      | 0.874                 |
| Handwashing                                                                                                                                                                                  | 35 (69)                              | 15 (29)                     | 1 (2)      | 61 (59)                                         | 42 (40)                     | 1 (1)      | 0.380                 |
| Physical distancing                                                                                                                                                                          | 11 (22)                              | 40 (78)                     | -          | 34 (33)                                         | 69 (66)                     | 1 (1)      | 0.264                 |
| Respiratory etiquette (e.g. covering mouth and nose with a bent elbow or tissue coughing or sneezing)                                                                                        | 34 (67)                              | 16 (31)                     | 1 (2)      | 47 (45)                                         | 56 (54)                     | 1 (1)      | 0.030                 |
| Temperature monitoring                                                                                                                                                                       | 22 (43)                              | 22 (43)                     | 7 (14)     | 55 (53)                                         | 47 (45)                     | 2 (2)      | 0.012                 |
| <b>Restrictions on businesses and institutions</b>                                                                                                                                           |                                      |                             |            |                                                 |                             |            |                       |
| Restrictions on bars, hotels and restaurants                                                                                                                                                 | 14 (27)                              | 36 (71)                     | 1 (2)      | 48 (46)                                         | 52 (52)                     | 2(2)       | 0.080                 |
| Restrictions on entertainment, conference, sport and cultural centres                                                                                                                        | 21 (41)                              | 27 (53)                     | 3 (6)      | 60 (58)                                         | 42 (40)                     | 2 (2)      | 0.097                 |
| Restrictions on food shops/markets                                                                                                                                                           | 18 (35)                              | 32 (63)                     | 1 (2)      | 28 (27)                                         | 73 (70)                     | 3 (3)      | 0.548                 |
| Restrictions on offices                                                                                                                                                                      | 22 (43)                              | 28 (55)                     | 1 (2)      | 49 (47)                                         | 53 (51)                     | 2 (2)      | 0.896                 |
| Restrictions on places of worship                                                                                                                                                            | 20 (39)                              | 22 (43)                     | 9 (18)     | 48 (46)                                         | 54 (52)                     | 2 (2)      | 0.002                 |
| Restrictions on schools or higher education institutions                                                                                                                                     | 13 (25)                              | 37 (73)                     | 1 (2)      | 60 (58)                                         | 42 (40)                     | 2 (2)      | P < 0.001             |
| <b>Restrictions on gatherings</b>                                                                                                                                                            |                                      |                             |            |                                                 |                             |            |                       |
| Restrictions on mass gatherings (e.g. conferences)                                                                                                                                           | 39 (76)                              | 11 (22)                     | 1 (2)      | 61 (59)                                         | 41 (39)                     | 2 (2)      | 0.085                 |
| Restrictions on private gatherings at home                                                                                                                                                   | 4 (8)                                | 46 (90)                     | 1 (2)      | 26 (25)                                         | 74 (71)                     | 4 (4)      | 0.015                 |
| Restrictions on private gatherings outside the home (e.g. funerals)                                                                                                                          | 17 (33)                              | 32 (63)                     | 2 (4)      | 32 (31)                                         | 70 (67)                     | 2 (2)      | 0.702                 |
| Restrictions on public gatherings outside the home                                                                                                                                           | 16 (31)                              | 34 (67)                     | 1 (2)      | 41 (39)                                         | 61 (59)                     | 2 (2)      | 0.618                 |
| <b>Implementing shielding measures</b>                                                                                                                                                       |                                      |                             |            |                                                 |                             |            |                       |
| Older people                                                                                                                                                                                 | 12 (24)                              | 32 (63)                     | 7 (14)     | 32 (31)                                         | 62 (60)                     | 10 (10)    | 0.545                 |

|                                                                        |         |         |         |         |         |         |       |
|------------------------------------------------------------------------|---------|---------|---------|---------|---------|---------|-------|
| People with long-term conditions or those with weakened immune systems | 10 (20) | 32 (63) | 9 (18)  | 32 (31) | 61 (59) | 11 (11) | 0.224 |
| Pregnant women                                                         | 13 (25) | 27 (53) | 11 (22) | 32 (31) | 60 (58) | 12 (12) | 0.249 |

\*Denominator is the total number of public health worker respondents in high-income countries

†Denominator is the total number of public health worker respondents in low and middle-income countries

\*\*P-value indicates difference between “Easy” or “Very easy” and “Difficult” or “Very difficult” categories only.

S3 Table. Barriers to implementing travel restrictions

|                                                                                                                                                                                                                                | High-income countries<br>n (%)<br>N=51* | Low and middle- income countries<br>n (%)<br>N=104† | P-value |
|--------------------------------------------------------------------------------------------------------------------------------------------------------------------------------------------------------------------------------|-----------------------------------------|-----------------------------------------------------|---------|
| <b>Barriers to implementing denial or restricted entry into other sub-national areas (e.g. states or provinces) /suspended or restricted movement within the country (e.g. restricted domestic flights, public transport)?</b> |                                         |                                                     |         |
| Lack of public support                                                                                                                                                                                                         | 38 (75)                                 | 55 (53)                                             | 0.016   |
| Lack of enforcement                                                                                                                                                                                                            | 31 (61)                                 | 45 (43)                                             | 0.060   |
| Lack of communication between policy-makers and the public                                                                                                                                                                     | 24 (47)                                 | 31 (30)                                             | 0.054   |
| Lack of policies and guidelines                                                                                                                                                                                                | 18 (35)                                 | 26 (25)                                             | 0.252   |
| Lack of trained staff                                                                                                                                                                                                          | 15 (29)                                 | 19 (18)                                             | 0.171   |
| Other                                                                                                                                                                                                                          | 7 (14)                                  | 7 (7)                                               | -       |
| Don't know                                                                                                                                                                                                                     | -                                       | 1 (1)                                               | -       |
| <b>Barriers to implementing entry/exit screening, isolation and quarantine measures</b>                                                                                                                                        |                                         |                                                     |         |
| Lack of enforcement                                                                                                                                                                                                            | 30 (59)                                 | 37 (36)                                             | 0.010   |
| Lack of public support                                                                                                                                                                                                         | 26 (51)                                 | 45 (43)                                             | 0.463   |
| Lack of financial support                                                                                                                                                                                                      | 22 (43)                                 | 32 (31)                                             | 0.181   |
| Lack of trained staff                                                                                                                                                                                                          | 18 (35)                                 | 39 (38)                                             | 0.928   |
| Lack of communication between policy-makers and the public                                                                                                                                                                     | 18 (35)                                 | 34 (33)                                             | 0.888   |
| Lack of policies and guidelines                                                                                                                                                                                                | 16 (31)                                 | 26 (25)                                             | 0.518   |
| Lack of equipment                                                                                                                                                                                                              | 15 (29)                                 | 37 (36)                                             | 0.560   |
| Other                                                                                                                                                                                                                          | 6 (12)                                  | 5 (5)                                               | -       |
| Don't know                                                                                                                                                                                                                     | -                                       | -                                                   | -       |
| <b>Barriers to implementing international entry/exit restrictions</b>                                                                                                                                                          |                                         |                                                     |         |
| Lack of enforcement                                                                                                                                                                                                            | 30 (59)                                 | 44 (42)                                             | 0.078   |
| Lack of communication between policy-makers and the public                                                                                                                                                                     | 26 (51)                                 | 41 (39)                                             | 0.233   |
| Lack of public support                                                                                                                                                                                                         | 26 (51)                                 | 38 (37)                                             | 0.123   |
| Lack of policies and guidelines                                                                                                                                                                                                | 23 (45)                                 | 31 (30)                                             | 0.090   |
| Lack of financial support                                                                                                                                                                                                      | 19 (37)                                 | 22 (21)                                             | 0.052   |
| Lack of trained staff                                                                                                                                                                                                          | 16 (31)                                 | 27 (26)                                             | 0.606   |
| Lack of equipment                                                                                                                                                                                                              | 7 (14)                                  | 27 (26)                                             | 0.128   |
| Other                                                                                                                                                                                                                          | 3 (6)                                   | 10 (10)                                             | -       |
| Don't know                                                                                                                                                                                                                     | -                                       | -                                                   | -       |
| <b>Barriers to implementing non-essential movement restrictions (e.g. stay at home order, lockdown)</b>                                                                                                                        |                                         |                                                     |         |
| Lack of public support                                                                                                                                                                                                         | 40 (78)                                 | 67 (64)                                             | 0.112   |
| Lack of enforcement                                                                                                                                                                                                            | 33 (65)                                 | 42 (40)                                             | 0.007   |
| Lack of communication between policy-makers and the public                                                                                                                                                                     | 28 (55)                                 | 41 (39)                                             | 0.099   |
| Lack of financial support                                                                                                                                                                                                      | 17 (33)                                 | 36 (35)                                             | 1.000   |
| Lack of policies and guidelines                                                                                                                                                                                                | 20 (39)                                 | 26 (25)                                             | 0.102   |
| Lack of trained staff                                                                                                                                                                                                          | 11 (22)                                 | 17 (16)                                             | 0.567   |
| Other                                                                                                                                                                                                                          | 7 (14)                                  | 14 (14)                                             | -       |
| Don't know                                                                                                                                                                                                                     | -                                       | -                                                   | -       |
| <b>Barriers to implementing restrictions on international flights, ferries or ships</b>                                                                                                                                        |                                         |                                                     |         |
| Lack of public support                                                                                                                                                                                                         | 25 (49)                                 | 29 (28)                                             | 0.0157  |
| Lack of communication between policy-makers and the public                                                                                                                                                                     | 21 (41)                                 | 36 (35)                                             | 0.536   |
| Lack of enforcement                                                                                                                                                                                                            | 21 (41)                                 | 31 (32)                                             | 0.270   |
| Lack of policies and guidelines                                                                                                                                                                                                | 21 (41)                                 | 29 (28)                                             | 0.139   |
| Lack of financial support                                                                                                                                                                                                      | 18 (35)                                 | 23 (22)                                             | 0.120   |
| Lack of trained staff                                                                                                                                                                                                          | 13 (26)                                 | 26 (25)                                             | 1.000   |

|                                                                                                              |        |         |       |
|--------------------------------------------------------------------------------------------------------------|--------|---------|-------|
| Other                                                                                                        | 4 (8)  | 5 (5)   | -     |
| Don't know                                                                                                   | -      | -       | -     |
| <b>Barriers to implementing visa restrictions (e.g. suspension or restrictions on work or travels visas)</b> |        |         |       |
| Lack of enforcement                                                                                          | 6 (12) | 18 (17) | 0.509 |
| Lack of financial support                                                                                    | 4 (8)  | 12 (12) | 0.582 |
| Lack of policies and guidelines                                                                              | 8 (16) | 21 (20) | 0.658 |
| Lack of public support                                                                                       | 9 (18) | 26 (25) | 0.410 |
| Lack of trained staff                                                                                        | 3 (6)  | 10 (10) | 0.547 |
| Other                                                                                                        | 4 (8)  | 3 (3)   | -     |
| Don't know                                                                                                   | -      | 2 (2)   | -     |

\*Denominator is the total number of public health worker respondents in high-income countries (including those who did not identify barriers).

†Denominator is the total number of public health worker respondents in low and middle-income countries (including those who did not identify barriers).



S4 Table. Barriers to implementing restrictions on offices, businesses and institutions

|                                                                                                               | High-income countries<br>n (%)<br>N=51* | Low and middle-income countries<br>n (%)<br>N=104† | P-value |
|---------------------------------------------------------------------------------------------------------------|-----------------------------------------|----------------------------------------------------|---------|
| <b>Barriers to implementing restrictions on bars, restaurants and hotels</b>                                  |                                         |                                                    |         |
| Lack of public support                                                                                        | 29 (57)                                 | 33 (32)                                            | 0.003   |
| Lack of financial support for owners of bars, restaurants and hotels                                          | 26 (51)                                 | 40 (39)                                            | 0.151   |
| Lack of enforcement                                                                                           | 17 (33)                                 | 32 (31)                                            | 0.776   |
| Lack of communication between policy-makers and the public                                                    | 14 (28)                                 | 17 (16)                                            | 0.111   |
| Lack of policies and guidelines                                                                               | 5 (10)                                  | 20 (19)                                            | 0.128   |
| Other                                                                                                         | 2 (4)                                   | 2 (2)                                              | -       |
| Don't know                                                                                                    | -                                       | -                                                  | -       |
| <b>Barriers to implementing restrictions on entertainment, conference, sport and cultural centres</b>         |                                         |                                                    |         |
| Lack of financial support for owners of restrictions on entertainment, conference, sport and cultural centres | 22 (43)                                 | 30 (29)                                            | 0.112   |
| Lack of public support                                                                                        | 19 (37)                                 | 30 (29)                                            | 0.382   |
| Lack of communication between policy-makers and the public                                                    | 11 (22)                                 | 11 (11)                                            | 0.110   |
| Lack of policies and guidelines                                                                               | 8 (16)                                  | 16 (15)                                            | 1.000   |
| Lack of enforcement                                                                                           | 8 (16)                                  | 16 (15)                                            | 1.000   |
| Other                                                                                                         | 2 (4)                                   | 5 (5)                                              | -       |
| Don't know                                                                                                    | -                                       | -                                                  | -       |
| <b>Barriers to implementing restrictions on food shops/markets</b>                                            |                                         |                                                    |         |
| Lack of public support                                                                                        | 21 (41)                                 | 56 (54)                                            | 0.190   |
| Lack of financial support for food shop/market owners                                                         | 20 (39)                                 | 52 (50)                                            | 0.274   |
| Lack of financial support for people who have been furloughed (put on temporary leave)                        | 18 (35)                                 | 52 (50)                                            | 0.120   |
| Lack of communication between policy-makers and the public                                                    | 15 (29)                                 | 29 (28)                                            | 0.993   |
| Lack of enforcement                                                                                           | 16 (31)                                 | 34 (33)                                            | 1.000   |
| Lack of policies and guidelines                                                                               | 10 (20)                                 | 23 (22)                                            | 0.881   |
| Other                                                                                                         | 3 (6)                                   | 5 (5)                                              | -       |
| Don't know                                                                                                    | 1 (2)                                   | -                                                  | -       |
| <b>Barriers to implementing restrictions on offices</b>                                                       |                                         |                                                    |         |
| Lack of public support                                                                                        | 21 (4)                                  | 30 (29)                                            | 0.175   |
| Lack of financial support for people who have been furloughed (temporary leave)                               | 18 (35)                                 | 37 (36)                                            | 1.000   |
| Lack of support from employer to work at home                                                                 | 15 (29)                                 | 31 (30)                                            | 1.000   |
| Lack of enforcement                                                                                           | 17 (33)                                 | 27 (26)                                            | 0.443   |
| Lack of communication between policy-makers and the public                                                    | 14 (28)                                 | 19 (18)                                            | 0.270   |
| Lack of policies and guidelines                                                                               | 10 (20)                                 | 22 (21)                                            | 1.000   |
| Other                                                                                                         | 3 (6)                                   | 4 (4)                                              | -       |
| Don't know                                                                                                    | -                                       | -                                                  | -       |
| <b>Barriers to implementing restrictions on places of worship</b>                                             |                                         |                                                    |         |
| Lack of public support                                                                                        | 13 (26)                                 | 42 (40)                                            | 0.101   |
| Lack of enforcement                                                                                           | 14 (28)                                 | 23 (22)                                            | 0.595   |
| Lack of communication between policy-makers and the public                                                    | 8 (16)                                  | 26 (25)                                            | 0.267   |
| Lack of policies and guidelines                                                                               | 7 (14)                                  | 22 (21)                                            | 0.371   |
| Other                                                                                                         | 2 (4)                                   | 3 (3)                                              | -       |
| Don't know                                                                                                    | -                                       | -                                                  | -       |

| <b>Barriers to implementing restrictions on schools or higher education institutes</b>                                |         |         |           |
|-----------------------------------------------------------------------------------------------------------------------|---------|---------|-----------|
| Lack of childcare support                                                                                             | 31 (61) | 29 (28) | P < 0.001 |
| Lack of remote/distance learning support (e.g. limited or no access to remote education resources, laptops, internet) | 27 (53) | 32 (31) | 0.013     |
| Lack of public support                                                                                                | 25 (49) | 21 (20) | P < 0.001 |
| Lack of communication between policy-makers and the public                                                            | 20 (39) | 18 (17) | 0.005     |
| Lack of enforcement                                                                                                   | 15 (29) | 16 (15) | 0.066     |
| Lack of policies and guidelines                                                                                       | 13 (26) | 19 (18) | 0.405     |
| Other                                                                                                                 | 7 (14)  | 4 (4)   | -         |
| Don't know                                                                                                            | -       | -       | -         |

\*Denominator is the total number of public health worker respondents in high-income countries (including those who did not identify barriers).

†Denominator is the total number of public health worker respondents in low and middle-income countries (including those who did not identify barriers).

S5 Table. Barriers to implementing restrictions on gatherings

|                                                                                                     | High-income countries<br>n (%) N=51* | Low and middle-income countries<br>n (%) N=104† | P-value |
|-----------------------------------------------------------------------------------------------------|--------------------------------------|-------------------------------------------------|---------|
| <b>Barriers to implementing restrictions on mass gatherings (e.g. conferences)</b>                  |                                      |                                                 |         |
| Lack of public support                                                                              | 7 (14)                               | 28 (27)                                         | 0.101   |
| Lack of enforcement                                                                                 | 7 (14)                               | 27 (26)                                         | 0.128   |
| Lack of resources to support mass gathering remotely<br>(e.g. technology infrastructure)            | 7 (14)                               | 25 (24)                                         | 0.201   |
| Socio-cultural practices and beliefs                                                                | 6 (12)                               | 26 (25)                                         | 0.089   |
| Lack of communication between policy-makers and the public                                          | 3 (6)                                | 15 (14)                                         | 0.181   |
| Lack of policies and guidelines                                                                     | 2 (4)                                | 16 (15)                                         | 0.059   |
| Other                                                                                               | 1 (2)                                | 2 (2)                                           | -       |
| Don't know                                                                                          | -                                    | -                                               | -       |
| <b>Barriers to implementing restrictions on private gatherings at home</b>                          |                                      |                                                 |         |
| Lack of public support                                                                              | 42 (82)                              | 60 (58)                                         | 0.004   |
| Lack of enforcement                                                                                 | 34 (67)                              | 45 (43)                                         | 0.010   |
| Lack of communication between policy-makers and the public                                          | 19 (37)                              | 24 (23)                                         | 0.097   |
| Lack of policies and guidelines                                                                     | 7 (14)                               | 20 (19)                                         | 0.533   |
| Other                                                                                               | 5 (10)                               | 5 (5)                                           | -       |
| Don't know                                                                                          | -                                    | 1 (1)                                           | -       |
| <b>Barriers to implementing restrictions on private gatherings outside the home (e.g. funerals)</b> |                                      |                                                 |         |
| Lack of public support                                                                              | 29 (57)                              | 63 (61)                                         | 0.788   |
| Lack of enforcement                                                                                 | 19 (37)                              | 45 (43)                                         | 0.589   |
| Lack of communication between policy-makers and the public                                          | 16 (31)                              | 30 (29)                                         | 0.892   |
| Lack of policies and guidelines                                                                     | 6 (12)                               | 18 (17)                                         | 0.509   |
| Other                                                                                               | 1 (2)                                | 5 (5)                                           | -       |
| Don't know                                                                                          | -                                    | -                                               | -       |
| <b>Barriers to implementing restrictions on public gatherings outside the home</b>                  |                                      |                                                 |         |
| Lack of public support                                                                              | 31 (61)                              | 54 (52)                                         | 0.384   |
| Lack of enforcement                                                                                 | 22 (43)                              | 40 (39)                                         | 0.701   |
| Socio-cultural practices and beliefs                                                                | 21 (41)                              | 41 (39)                                         | 0.972   |
| Lack of communication between policy-makers and the public                                          | 20 (39)                              | 22 (21)                                         | 0.029   |
| Lack of policies and guidelines                                                                     | 7 (14)                               | 23 (22)                                         | 0.305   |
| Other                                                                                               | 4 (8)                                | 2 (2)                                           | -       |
| Don't know                                                                                          | -                                    | -                                               | -       |

\*Denominator is the total number of public health worker respondents in high-income countries (including those who did not identify barriers).

†Denominator is the total number of public health worker respondents in low and middle-income countries (including those who did not identify barriers).

S6 Table. Barriers to implementing individual measures

|                                                                                                                                            | High-income countries<br>n (%) N=51* | Low and middle-income countries<br>n (%) N=104† | P-value |
|--------------------------------------------------------------------------------------------------------------------------------------------|--------------------------------------|-------------------------------------------------|---------|
| <b>Barriers to implementing face masks/ face coverings</b>                                                                                 |                                      |                                                 |         |
| Lack of public support                                                                                                                     | 17 (33)                              | 37 (36)                                         | 0.923   |
| Misinformation (e.g. rumours or myths)                                                                                                     | 16 (31)                              | 36 (35)                                         | 0.825   |
| Socio-cultural beliefs and practices                                                                                                       | 11 (22)                              | 33 (32)                                         | 0.259   |
| Lack of enforcement                                                                                                                        | 12 (24)                              | 27 (26)                                         | 0.896   |
| Social stigma                                                                                                                              | 7 (14)                               | 19 (18)                                         | 0.629   |
| Lack of communication between policy-makers and the public                                                                                 | 7 (14)                               | 14 (14)                                         | 1.000   |
| Lack of resources (e.g. face masks/ face coverings)                                                                                        | 6 (12)                               | 39 (38)                                         | 0.002   |
| Lack of communication between healthcare providers and the public                                                                          | 5 (10)                               | 16 (15)                                         | 0.481   |
| Lack of policies and guidelines                                                                                                            | 4 (8)                                | 10 (10)                                         | 1.000   |
| Other                                                                                                                                      | 6 (12)                               | 3 (3)                                           | -       |
| Don't know                                                                                                                                 | -                                    | 1 (1)                                           | -       |
| <b>Barriers to implementing handwashing</b>                                                                                                |                                      |                                                 |         |
| Lack of resources (e.g. handwashing areas, water, soap, alcohol rub)                                                                       | 10 (20)                              | 34 (33)                                         | 0.132   |
| Lack of enforcement                                                                                                                        | 8 (16)                               | 19 (18)                                         | 0.863   |
| Lack of public support                                                                                                                     | 4 (8)                                | 24 (23)                                         | 0.025   |
| Misinformation (e.g. rumours or myths)                                                                                                     | 4 (8)                                | 23 (22)                                         | 0.041   |
| Socio-cultural beliefs and practices                                                                                                       | 6 (12)                               | 15 (14)                                         | 0.838   |
| Lack of communication between healthcare providers and the public                                                                          | 2 (4)                                | 16 (15)                                         | 0.059   |
| Lack of communication between policy-makers and the public                                                                                 | 2 (4)                                | 11 (11)                                         | 0.223   |
| Social stigma                                                                                                                              | 1 (2)                                | 10 (10)                                         | 0.103   |
| Lack of policies and guidelines                                                                                                            | 1 (2)                                | 7 (7)                                           | 0.273   |
| Other                                                                                                                                      | 2 (4)                                | 4 (4)                                           | -       |
| Don't know                                                                                                                                 | -                                    | -                                               | -       |
| <b>Barriers to implementing physical distancing</b>                                                                                        |                                      |                                                 |         |
| Not possible to maintain physical distance at workplace due to the nature of the work                                                      | 23 (45)                              | 49 (47)                                         | 0.948   |
| Lack of public support                                                                                                                     | 22 (43)                              | 55 (53)                                         | 0.332   |
| Socio-cultural beliefs and practices                                                                                                       | 19 (37)                              | 42 (40)                                         | 0.842   |
| Lack of enforcement                                                                                                                        | 20 (39)                              | 38 (37)                                         | 0.883   |
| Misinformation (e.g. rumours or myths)                                                                                                     | 19 (37)                              | 29 (28)                                         | 0.317   |
| Lack of communication between healthcare providers and the public                                                                          | 8 (16)                               | 20 (19)                                         | 0.751   |
| Lack of communication between policy-makers and the public                                                                                 | 11 (22)                              | 18 (17)                                         | 0.675   |
| Social stigma                                                                                                                              | 3 (6)                                | 18 (17)                                         | 0.078   |
| Lack of policies and guidelines                                                                                                            | 4 (8)                                | 11 (11)                                         | 0.775   |
| Other                                                                                                                                      | 8 (16)                               | 4 (4)                                           | -       |
| Don't know                                                                                                                                 | -                                    | -                                               | -       |
| <b>Barriers to implementing respiratory etiquette (e.g. covering mouth and nose with a bent elbow or tissue when coughing or sneezing)</b> |                                      |                                                 |         |
| Lack of public support                                                                                                                     | 5 (10)                               | 35 (34)                                         | 0.003   |
| Socio-cultural beliefs and practices                                                                                                       | 9 (18)                               | 28 (27)                                         | 0.284   |
| Misinformation (e.g. rumours or myths)                                                                                                     | 6 (12)                               | 30 (29)                                         | 0.030   |
| Social stigma                                                                                                                              | 1 (2)                                | 20 (19)                                         | 0.002   |
| Lack of communication between healthcare providers and the public                                                                          | 3 (6)                                | 18 (17)                                         | 0.078   |
| Lack of enforcement                                                                                                                        | 5 (10)                               | 14 (14)                                         | 0.695   |
| Lack of communication between policy-makers and the public                                                                                 | 1 (2)                                | 12 (12)                                         | 0.062   |
| Lack of policies and guidelines                                                                                                            | -                                    | 10 (10)                                         | 0.052   |
| Other                                                                                                                                      | 2 (4)                                | 4 (4)                                           | -       |
| Don't know                                                                                                                                 | -                                    | -                                               | -       |

| <b>Barriers to implementing temperature monitoring</b>            |         |         |       |
|-------------------------------------------------------------------|---------|---------|-------|
| Lack of equipment                                                 | 14 (28) | 39 (38) | 0.290 |
| Lack of enforcement                                               | 10 (20) | 18 (17) | 0.898 |
| Misinformation (e.g. rumours or myths)                            | 9 (18)  | 18 (17) | 1.000 |
| Lack of public support                                            | 6 (12)  | 22 (21) | 0.228 |
| Lack of policies and guidelines                                   | 7 (14)  | 8 (8)   | 0.366 |
| Socio-cultural beliefs and practices                              | 5 (10)  | 13 (13) | 0.822 |
| Lack of communication between healthcare providers and the public | 3 (6)   | 9 (9)   | 0.752 |
| Lack of communication between policy-makers and the public        | 4 (8)   | 8 (8)   | 1.000 |
| Social stigma                                                     | 2 (4)   | 10 (10) | 0.339 |
| Other                                                             | 7 (14)  | 3 (3)   | -     |
| Don't know                                                        | -       | -       | -     |

\*Denominator is the total number of public health worker respondents in high-income countries (including those who did not identify barriers).

†Denominator is the total number of public health worker respondents in low and middle-income countries (including those who did not identify barriers).

S7 Table. Barriers to implementing contact tracing methods

|                                                                                               | High-income countries<br>n (%) N=51* | Low and middle-income<br>countries n (%) N=104† | P-value   |
|-----------------------------------------------------------------------------------------------|--------------------------------------|-------------------------------------------------|-----------|
| <b>Barriers to implementing closed-circuit television (CCTV)/ electronic tags</b>             |                                      |                                                 |           |
| Privacy laws                                                                                  | 24 (47)                              | 17 (16)                                         | P < 0.001 |
| Lack of public support                                                                        | 19 (47)                              | 23 (22)                                         | 0.072     |
| Lack of technology infrastructure                                                             | 12 (24)                              | 47 (45)                                         | 0.015     |
| Social stigma                                                                                 | 9 (18)                               | 8 (8)                                           | 0.112     |
| Socio-cultural beliefs and practices                                                          | 8 (16)                               | 11 (11)                                         | 0.515     |
| Lack of trained staff                                                                         | 7 (14)                               | 24 (23)                                         | 0.249     |
| Misinformation (e.g. rumours or myths)                                                        | 7 (14)                               | 8 (8)                                           | 0.366     |
| Lack of policies and guidelines                                                               | 6 (12)                               | 19 (18)                                         | 0.422     |
| Lack of communication between policy-makers and the public                                    | 4 (8)                                | 7 (7)                                           | 0.752     |
| Lack of enforcement                                                                           | 4 (8)                                | 15 (14)                                         | 0.304     |
| Lack of communication between healthcare providers and the public                             | 2 (4)                                | 10 (10)                                         | 0.339     |
| Other                                                                                         | 1 (2)                                | 2 (2)                                           | -         |
| Don't know                                                                                    | -                                    | -                                               | -         |
| <b>Barriers to implementing contact tracing methods using peoples' bank card transactions</b> |                                      |                                                 |           |
| Privacy laws                                                                                  | 30 (59)                              | 23 (22)                                         | P < 0.001 |
| Lack of public support                                                                        | 19 (37)                              | 23 (22)                                         | 0.072     |
| Lack of technology infrastructure                                                             | 10 (20)                              | 44 (42)                                         | 0.009     |
| Lack of policies and guidelines                                                               | 8 (16)                               | 21 (20)                                         | 0.648     |
| Misinformation (e.g. rumours or myths)                                                        | 8 (16)                               | 11 (11)                                         | 0.515     |
| Lack of trained staff                                                                         | 7 (14)                               | 21 (20)                                         | 0.447     |
| Socio-cultural beliefs and practices                                                          | 7 (14)                               | 13 (13)                                         | 1.000     |
| Social stigma                                                                                 | 5 (10)                               | 8 (8)                                           | 0.891     |
| Lack of enforcement                                                                           | 2 (4)                                | 14 (14)                                         | 0.091     |
| Lack of communication between policy-makers and the public                                    | 4 (8)                                | 10 (10)                                         | 1.000     |
| Lack of communication between healthcare providers and the public                             | 3 (6)                                | 6 (9)                                           | 0.752     |
| Other                                                                                         | 2 (4)                                | 5 (5)                                           | -         |
| Don't know                                                                                    | -                                    | 1 (1)                                           | -         |
| <b>Barriers to implementing mobile phone contact tracing apps / GPS-based tracing</b>         |                                      |                                                 |           |
| Lack of technology infrastructure                                                             | 17 (33)                              | 42 (40)                                         | 0.501     |
| Privacy laws                                                                                  | 17 (33)                              | 17 (16)                                         | 0.028     |
| Lack of public support                                                                        | 14 (28)                              | 25 (24)                                         | 0.793     |
| Misinformation (e.g. rumours or myths)                                                        | 13 (26)                              | 15 (14)                                         | 0.144     |
| Lack of communication between policy-makers and the public                                    | 11 (22)                              | 11 (11)                                         | 0.110     |
| Lack of trained staff                                                                         | 9 (18)                               | 26 (25)                                         | 0.410     |
| Lack of enforcement                                                                           | 6 (12)                               | 15 (14)                                         | 0.838     |
| Socio-cultural beliefs and practices                                                          | 7 (14)                               | 17 (16)                                         | 0.851     |
| Lack of communication between healthcare providers and the public                             | 7 (14)                               | 11 (11)                                         | 0.758     |
| Social stigma                                                                                 | 4 (8)                                | 12(12)                                          | 0.582     |
| Lack of policies and guidelines                                                               | 3 (6)                                | 15 (14)                                         | 0.181     |
| Other                                                                                         | 6 (12)                               | 5 (5)                                           | -         |
| Don't know                                                                                    | -                                    | 1 (1)                                           | -         |

| <b>Barriers to implementing physical contact tracing methods (e.g. in-person visits, by phone)</b> |         |         |           |
|----------------------------------------------------------------------------------------------------|---------|---------|-----------|
| Lack of trained staff                                                                              | 34 (67) | 44 (42) | 0.007     |
| Lack of public support                                                                             | 26 (51) | 44 (42) | 0.400     |
| Lack of technology infrastructure                                                                  | 22 (43) | 45 (43) | 1.000     |
| Misinformation (e.g. rumours or myths)                                                             | 20 (39) | 29 (28) | 0.214     |
| Lack of communication between policy-makers and the public                                         | 20 (39) | 13 (13) | P < 0.001 |
| Privacy laws                                                                                       | 18 (35) | 19 (18) | 0.033     |
| Lack of enforcement                                                                                | 16 (31) | 24 (23) | 0.361     |
| Social stigma                                                                                      | 11 (22) | 36 (35) | 0.140     |
| Socio-cultural beliefs and practices                                                               | 12 (24) | 30 (29) | 0.612     |
| Lack of communication between healthcare providers and the public                                  | 11 (22) | 20 (19) | 0.898     |
| Lack of policies and guidelines                                                                    | 5 (10)  | 14 (14) | 0.695     |
| Other                                                                                              | 7 (14)  | 7 (7)   | -         |
| Don't know                                                                                         | -       | 1 (1)   | -         |

\*Denominator is the total number of public health worker respondents in high-income countries (including those who did not identify barriers).

†Denominator is the total number of public health worker respondents in low and middle-income countries (including those who did not identify barriers).

S8 Table. Barriers to implementing shielding measures for vulnerable populations

|                                                                                                                                                 | Public Health Workers (PHWs)            |                                                    |         | Healthcare Workers (HCWs)                |                                                   |         |
|-------------------------------------------------------------------------------------------------------------------------------------------------|-----------------------------------------|----------------------------------------------------|---------|------------------------------------------|---------------------------------------------------|---------|
|                                                                                                                                                 | High-income countries<br>n (%)<br>N=51* | Low and middle-income countries<br>n (%)<br>N=104† | P-value | High-income countries<br>n (%)<br>N=25†† | Low and middle-income countries<br>n (%)<br>N=42¶ | P-value |
| <b>Older people</b>                                                                                                                             |                                         |                                                    |         |                                          |                                                   |         |
| Lack of home support for older people (e.g. medical care, supply of food/medications)                                                           | 24 (47)                                 | 54 (52)                                            | 0.691   | 11 (44)                                  | 26 (62)                                           | 0.241   |
| Other                                                                                                                                           | 13 (26)                                 | 4 (4)                                              | -       | 6 (24)                                   | 14 (33)                                           | -       |
| Lack of public support                                                                                                                          | 13 (26)                                 | 32 (31)                                            | 0.623   | 4 (16)                                   | 14 (33)                                           | 0.595   |
| Socio-cultural beliefs and practices                                                                                                            | 10 (20)                                 | 34 (33)                                            | 0.132   | 4 (16)                                   | 13 (31)                                           | 0.248   |
| Misinformation (e.g. rumours or myths)                                                                                                          | 8 (16)                                  | 21 (20)                                            | 0.648   | 5 (20)                                   | 2 (5)                                             | 0.027   |
| Lack of enforcement                                                                                                                             | 8 (16)                                  | 19 (18)                                            | 0.863   | 2 (8)                                    | 11 (26)                                           | 0.186   |
| Lack of communication between healthcare providers and the public                                                                               | 8 (16)                                  | 16 (15)                                            | 1.000   | 3 (12)                                   | 16 (38)                                           | 0.109   |
| Lack of communication between policy-makers and the public                                                                                      | 6 (12)                                  | 13 (13)                                            | 1.000   | 3 (12)                                   | 14 (33)                                           | 0.159   |
| Lack of policies and guidelines                                                                                                                 | 5 (10)                                  | 22 (21)                                            | 0.127   | 3 (12)                                   | 10 (24)                                           | 0.081   |
| Social stigma                                                                                                                                   | 3 (6)                                   | 17 (16)                                            | 0.078   | 2 (8)                                    | 10 (24)                                           | 0.342   |
| Don't know                                                                                                                                      | -                                       | -                                                  | -       | -                                        | -                                                 | -       |
| <b>People with long-term conditions or those with weakened immune systems</b>                                                                   |                                         |                                                    |         |                                          |                                                   |         |
| Lack of home support for people with long-term conditions or those with weakened immune systems (e.g. medical care, supply of food/medications) | 24 (47)                                 | 44 (42)                                            | 0.698   | 8 (32)                                   | 24 (57)                                           | 0.081   |
| Other                                                                                                                                           | 14 (28)                                 | 2 (2)                                              | -       | 7 (28)                                   | 11 (26)                                           | -       |
| Lack of public support                                                                                                                          | 10 (20)                                 | 30 (29)                                            | 0.298   | 3 (12)                                   | 16 (38)                                           | 0.027   |
| Lack of communication between healthcare providers and the public                                                                               | 8 (16)                                  | 21 (20)                                            | 0.648   | 4 (16)                                   | 13 (31)                                           | 0.023   |
| Lack of communication between policy-makers and healthcare providers                                                                            | 8 (16)                                  | 12 (12)                                            | 0.639   | 1 (4)                                    | 16 (38)                                           | 0.190   |
| Lack of communication between policy-makers and the public                                                                                      | 6 (12)                                  | 13 (13)                                            | 1.000   | 1 (4)                                    | 13 (31)                                           | 1.000   |
| Socio-cultural beliefs and practices                                                                                                            | 6 (12)                                  | 22 (21)                                            | 0.228   | 1 (4)                                    | 12 (29)                                           | 0.011   |
| Lack of enforcement                                                                                                                             | 5 (10)                                  | 21 (20)                                            | 0.162   | 1 (4)                                    | 12 (29)                                           | 0.02    |
| Lack of policies and guidelines                                                                                                                 | 5 (10)                                  | 21 (20)                                            | 0.162   | 1 (4)                                    | 13 (31)                                           | 0.2     |
| Misinformation (e.g. rumours or myths)                                                                                                          | 4 (8)                                   | 16 (15)                                            | 0.214   | 2 (8)                                    | 10 (24)                                           | 0.001   |
| Social stigma                                                                                                                                   | 4 (8)                                   | 19 (18)                                            | 0.098   | 2 (8)                                    | 1 (2)                                             | 0.011   |
| Don't know                                                                                                                                      | -                                       | -                                                  | -       | -                                        | -                                                 | -       |
| <b>Pregnant women</b>                                                                                                                           |                                         |                                                    |         |                                          |                                                   |         |
| Lack of financial support for pregnant women                                                                                                    | 20 (39)                                 | 41 (39)                                            | 1.000   | 10 (40)                                  | 19 (45)                                           | 0.870   |
| Lack of home support for pregnant women (e.g. medical care, supply of food/medications)                                                         | 15 (29)                                 | 40 (39)                                            | 0.353   | 9 (36)                                   | 21 (50)                                           | 0.389   |
| Lack of public support                                                                                                                          | 11 (22)                                 | 27 (26)                                            | 0.690   | 8 (32)                                   | 15 (36)                                           | 0.047   |
| Other                                                                                                                                           | 9 (18)                                  | 2 (2)                                              | -       | 8 (32)                                   | 14 (44)                                           | -       |
| Socio-cultural beliefs and practices                                                                                                            | 6 (12)                                  | 27 (26)                                            | 0.068   | 6 (24)                                   | 15 (36)                                           | 0.489   |
| Lack of communication between healthcare providers and the public                                                                               | 6 (12)                                  | 17 (16)                                            | 0.608   | 5 (20)                                   | 13 (31)                                           | 0.022   |
| Lack of communication between policy-makers and the public                                                                                      | 6 (12)                                  | 14 (14)                                            | 0.967   | 3 (12)                                   | 15 (36)                                           | 0.965   |
| Lack of enforcement                                                                                                                             | 5 (10)                                  | 18 (17)                                            | 0.320   | 2 (8)                                    | 12 (29)                                           | 0.063   |



|                                        |        |         |       |        |         |       |
|----------------------------------------|--------|---------|-------|--------|---------|-------|
| Misinformation (e.g. rumours or myths) | 5 (10) | 15 (14) | 0.581 | -      | 12 (29) | 0.467 |
| Lack of policies and guidelines        | 4 (8)  | 22 (21) | 0.041 | -      | 10 (24) | 1.000 |
| Social stigma                          | 3 (6)  | 14 (14) | 0.183 | 4 (16) | 1 (2)   | 0.009 |
| Don't know                             | -      | 1 (1)   | -     | -      | -       | -     |

\*Denominator is the total number of public health worker respondents in high-income countries (including those who did not identify barriers).

†Denominator is the total number of public health worker respondents in low and middle-income countries (including those who did not identify barriers).

\*\*Denominator is the total number of healthcare worker respondents in high-income countries (including those who did not identify barriers).

‡ Denominator is the total number of healthcare worker respondents in low and middle-income countries (including those who did not identify barriers).

S9 Table. Vaccine implementation and prioritisation of population groups

| Do you think a vaccine, if developed, should be introduced to prevent COVID-19?                                                     |                                         |                                                               |         |                                                      |                                                                |         |
|-------------------------------------------------------------------------------------------------------------------------------------|-----------------------------------------|---------------------------------------------------------------|---------|------------------------------------------------------|----------------------------------------------------------------|---------|
|                                                                                                                                     | Healthcare workers (HCWs)               |                                                               |         | Public health workers (PHWs)                         |                                                                |         |
|                                                                                                                                     | High-income countries<br>n (%)<br>N=25* | Low and middle-income countries<br>n (%)<br>N=42 <sup>†</sup> | P-value | High-income countries<br>n (%)<br>N=51 <sup>**</sup> | Low and middle-income countries<br>n (%)<br>N=104 <sup>¶</sup> | P-value |
| Yes                                                                                                                                 | 22 (88)                                 | 41 (98)                                                       |         | 50 (98)                                              | 94 (90)                                                        |         |
| No                                                                                                                                  | 2 (8)                                   | -                                                             | 0.255   | 1 (2)                                                | 7 (7)                                                          | 0.261   |
| Don't know                                                                                                                          | 1 (4)                                   | 1 (2)                                                         | -       | -                                                    | 3 (3)                                                          | -       |
| Do you think a vaccine should be prioritised for certain population groups (e.g. pregnant women, healthcare workers, older people)? |                                         |                                                               |         |                                                      |                                                                |         |
| Yes                                                                                                                                 | 13 (52)                                 | 24 (57)                                                       |         | 40 (78)                                              | 50 (48)                                                        |         |
| No – everyone should be vaccinated                                                                                                  | 9 (36)                                  | 17 (40)                                                       | 1.000   | 10 (20)                                              | 41 (39)                                                        | 0.005   |
| NA                                                                                                                                  | 3 (12)                                  | 1 (2)                                                         | -       | 1 (2)                                                | 10 (10)                                                        | -       |
| Don't know                                                                                                                          | -                                       | -                                                             | -       | -                                                    | 3 (3)                                                          | -       |
| Which of the following population groups do you think a vaccine should be prioritised for? (please select up to 3 groups)           |                                         |                                                               |         |                                                      |                                                                |         |
| Healthcare/ Social care/ Emergency professionals                                                                                    | 12 (48)                                 | 10 (24)                                                       | 0.076   | 24 (47)                                              | 22 (21)                                                        | 0.002   |
| Infants                                                                                                                             | -                                       | 1 (2)                                                         | -       | 3 (6)                                                | 8 (8)                                                          | 0.099   |
| Older people                                                                                                                        | 9 (36)                                  | 9 (2)                                                         | 0.309   | 20 (40)                                              | 23 (22)                                                        | 0.041   |
| People who are carers for dependents                                                                                                | 1 (4)                                   | 1 (2)                                                         | 1.000   | 2 (4)                                                | 4 (4)                                                          | 1.000   |
| People who are displaced (e.g. living in refugee camps)                                                                             | 2 (8)                                   | 1 (2)                                                         | 0.551   | 1 (2)                                                | 2 (2)                                                          | 1.000   |
| People who are in closed settings (e.g. prisons, long-term care facilities)                                                         | 2 (8)                                   | 2 (5)                                                         | 0.626   | 11 (22)                                              | 7 (7)                                                          | 0.015   |
| People who are working                                                                                                              | -                                       | 2 (5)                                                         | -       | 1 (2)                                                | -                                                              | -       |
| People who have long-term health conditions (e.g. diabetes, heart disease)                                                          | 8 (32)                                  | 15 (36)                                                       | 0.965   | 24 (27)                                              | 25 (24)                                                        | 0.007   |
| People who have weakened immune systems (e.g. cancer or transplant patients)                                                        | 5 (20)                                  | 9 (21)                                                        | 1.000   | 22 (43)                                              | 20 (19)                                                        | 0.003   |
| Pregnant women                                                                                                                      | -                                       | 9 (21)                                                        | -       | 1 (2)                                                | 19 (18)                                                        | 0.004   |
| Homeless people                                                                                                                     | -                                       | -                                                             | -       | 1 (2)                                                | 1 (1)                                                          | 0.551   |
| School age children                                                                                                                 | -                                       | 3 (7)                                                         | -       | 3 (6)                                                | 7 (7)                                                          | 1.000   |
| Don't know                                                                                                                          | -                                       | -                                                             | -       | 1 (2)                                                | -                                                              | -       |
| Other                                                                                                                               | -                                       | -                                                             | -       | 1 (2)                                                | 1 (1)                                                          | -       |

\*Denominator is the total number of healthcare worker respondents in high-income countries.

<sup>†</sup>Denominator is the total number of healthcare worker respondents in low and middle-income countries.

<sup>\*\*</sup>Denominator is the total number of public health worker respondents in high-income countries.

<sup>¶</sup>Denominator is the total number of public health worker respondents in low and middle-income countries.

## S10. Practicality of implementing a COVID-19 vaccine for certain population groups

| How easy do you think it is to provide a COVID-19 vaccine to these population groups in terms of practical challenges? |                                      |                                                 |          |                                       |                                                |          |
|------------------------------------------------------------------------------------------------------------------------|--------------------------------------|-------------------------------------------------|----------|---------------------------------------|------------------------------------------------|----------|
|                                                                                                                        | Public health workers (PCWs)         |                                                 |          | Healthcare workers (HCWs)             |                                                |          |
|                                                                                                                        | High-income countries<br>n (%) N=51* | Low and middle-income countries<br>n (%) N=104† | P-value* | High-income countries<br>n (%) N=25†† | Low and middle-income countries<br>n (%) N=42¶ | P-value§ |
| <b>Healthcare/ Social care/ Emergency professionals</b>                                                                |                                      |                                                 |          |                                       |                                                |          |
| Easy or very easy                                                                                                      | 44 (86)                              | 87 (84)                                         | 1.000    | 22 (88)                               | 38 (91)                                        | 1.000    |
| Difficult or very difficult                                                                                            | 6 (12)                               | 11 (11)                                         |          | 1 (4)                                 | 3 (7)                                          |          |
| Don't know                                                                                                             | -                                    | 5 (5)                                           |          | -                                     | -                                              |          |
| Not applicable (NA)                                                                                                    | 1 (2)                                | 1 (1)                                           |          | 2 (8)                                 | 1 (2)                                          |          |
| <b>People who are in closed settings (e.g. prisons, long-term care facilities)</b>                                     |                                      |                                                 |          |                                       |                                                |          |
| Easy or very easy                                                                                                      | 4 (86)                               | 77 (74)                                         | 0.198    | 20 (80)                               | 34 (81)                                        | 1.000    |
| Difficult or very difficult                                                                                            | 6 (12)                               | 22 (21)                                         |          | 3 (12)                                | 7 (17)                                         |          |
| Don't know                                                                                                             | -                                    | 5 (5)                                           |          | -                                     | -                                              |          |
| Not applicable (NA)                                                                                                    | 1 (2)                                | -                                               |          | 2 (8)                                 | -                                              |          |
| <b>School age children</b>                                                                                             |                                      |                                                 |          |                                       |                                                |          |
| Easy or very easy                                                                                                      | 43 (84)                              | 71 (68)                                         | 0.089    | 22 (88)                               | 30 (71)                                        | 0.044    |
| Difficult or very difficult                                                                                            | 6 (12)                               | 25 (24)                                         |          | 1 (4)                                 | 10 (24)                                        |          |
| Don't know                                                                                                             | 1 (2)                                | 5 (5)                                           |          | -                                     | 1 (2)                                          |          |
| Not applicable (NA)                                                                                                    | 1 (2)                                | 3 (3)                                           |          | 2 (8)                                 | 1 (2)                                          |          |
| <b>Pregnant women</b>                                                                                                  |                                      |                                                 |          |                                       |                                                |          |
| Easy or very easy                                                                                                      | 40 (78)                              | 70 (67)                                         | 0.097    | 20 (80)                               | 31 (74)                                        | 0.300    |
| Difficult or very difficult                                                                                            | 6 (12)                               | 26 (25)                                         |          | 2 (8)                                 | 9 (22)                                         |          |
| Don't know                                                                                                             | 2 (4)                                | 6 (6)                                           |          | 1 (4)                                 | 1 (2)                                          |          |
| Not applicable (NA)                                                                                                    | 3 (6)                                | 2 (2)                                           |          | 2 (8)                                 | 1 (2)                                          |          |
| <b>Infants</b>                                                                                                         |                                      |                                                 |          |                                       |                                                |          |
| Easy or very easy                                                                                                      | 39 (77)                              | 62 (60)                                         | 0.087    | 20 (80)                               | 32 (76)                                        | 0.697    |
| Difficult or very difficult                                                                                            | 7 (14)                               | 27 (26)                                         |          | 2 (8)                                 | 6 (14)                                         |          |
| Don't know                                                                                                             | 2 (4)                                | 5 (5)                                           |          | -                                     | 1 (2)                                          |          |
| Not applicable (NA)                                                                                                    | 3 (6)                                | 10 (10)                                         |          | 3 (12)                                | 2 (5)                                          |          |
| <b>People who have weakened immune systems (e.g. tuberculosis, cancer or transplant patients)</b>                      |                                      |                                                 |          |                                       |                                                |          |
| Easy or very easy                                                                                                      | 39 (77)                              | 62 (60)                                         | 0.122    | 17 (68)                               | 28 (67)                                        | 0.852    |
| Difficult or very difficult                                                                                            | 7 (14)                               | 27 (26)                                         |          | 6 (24)                                | 13 (31)                                        |          |
| Don't know                                                                                                             | 2 (4)                                | 5 (5)                                           |          | 1 (4)                                 | -                                              |          |
| Not applicable (NA)                                                                                                    | 3 (6)                                | 10 (10)                                         |          | 1 (4)                                 | 1 (2)                                          |          |
| <b>People who have long-term health conditions (e.g. HIV, diabetes, heart disease)</b>                                 |                                      |                                                 |          |                                       |                                                |          |
| Easy or very easy                                                                                                      | 34 (67)                              | 61 (59)                                         | 0.610    | 17 (68)                               | 28 (67)                                        | 0.746    |
| Difficult or very difficult                                                                                            | 16 (31)                              | 37 (36)                                         |          | 6 (24)                                | 14 (33)                                        |          |
| Don't know                                                                                                             | 1 (2)                                | 6 (6)                                           |          | 1 (4)                                 | -                                              |          |
| Not applicable (NA)                                                                                                    | -                                    | -                                               |          | 1 (4)                                 | -                                              |          |
| <b>Older people</b>                                                                                                    |                                      |                                                 |          |                                       |                                                |          |
| Easy or very easy                                                                                                      | 32 (63)                              | 57 (55)                                         | 0.611    | 14 (56)                               | 18 (43)                                        | 0.386    |
| Difficult or very difficult                                                                                            | 18 (35)                              | 41 (49)                                         |          | 10 (40)                               | 23 (55)                                        |          |
| Don't know                                                                                                             | 1 (2)                                | 6 (6)                                           |          | -                                     | -                                              |          |
| Not applicable (NA)                                                                                                    | -                                    | -                                               |          | 1 (4)                                 | 1 (2)                                          |          |
| <b>People who are carers for dependents</b>                                                                            |                                      |                                                 |          |                                       |                                                |          |
| Easy or very easy                                                                                                      | 27 (53)                              | 63 (61)                                         | 0.404    | 14 (56)                               | 25 (60)                                        | 1.000    |
| Difficult or very difficult                                                                                            | 21 (41)                              | 34 (33)                                         |          | 9 (36)                                | 16 (38)                                        |          |
| Don't know                                                                                                             | 2 (4)                                | 6 (6)                                           |          | -                                     | -                                              |          |
| Not applicable (NA)                                                                                                    | 1 (2)                                | 1 (1)                                           |          | 2 (8)                                 | 1 (2)                                          |          |
| <b>People who are working</b>                                                                                          |                                      |                                                 |          |                                       |                                                |          |
| Easy or very easy                                                                                                      | 24 (47)                              | 60 (58)                                         | 0.362    | 14 (56)                               | 24 (57)                                        | 0.649    |
| Difficult or very difficult                                                                                            | 23 (45)                              | 39 (38)                                         |          | 7 (28)                                | 18 (43)                                        |          |
| Don't know                                                                                                             | 2 (4)                                | 4 (4)                                           |          | 1 (4)                                 | -                                              |          |
| Not applicable (NA)                                                                                                    | 2 (4)                                | 1 (1)                                           |          | 2 (8)                                 | -                                              |          |
| <b>People who are displaced (e.g. living in refugee camps)</b>                                                         |                                      |                                                 |          |                                       |                                                |          |
| Easy or very easy                                                                                                      | 10 (20)                              | 52 (50)                                         | 0.001    | 6 (24)                                | 21 (50)                                        | 0.090    |
| Difficult or very difficult                                                                                            | 35 (69)                              | 47 (45)                                         |          | 15 (60)                               | 17 (41)                                        |          |
| Don't know                                                                                                             | 4 (8)                                | 5 (5)                                           |          | 2 (8)                                 | 1 (2)                                          |          |
| Not applicable (NA)                                                                                                    | 2 (4)                                | -                                               |          | 2 (8)                                 | 3 (7)                                          |          |
| <b>People who are homeless</b>                                                                                         |                                      |                                                 |          |                                       |                                                |          |

|                             |         |         |       |         |         |       |
|-----------------------------|---------|---------|-------|---------|---------|-------|
| Easy or very easy           | 2 (4)   | 23 (22) |       | 3 (12)  | 7 (17)  | 0.731 |
| Difficult or very difficult | 43 (84) | 73 (70) | 0.010 | 17 (68) | 28 (67) |       |
| Don't know                  | 5 (10)  | 5 (5)   |       | 2 (8)   | 3 (7)   |       |
| Not applicable (NA)         | 1 (2)   | 3 (3)   |       | 2 (8)   | 4(10)   |       |

\*Denominator is the total number of public health worker respondents in high-income countries.

†Denominator is the total number of public health worker respondents in low and middle-income countries.

\*\*Denominator is the total number of healthcare worker respondents in high-income countries.

‡Denominator is the total number of healthcare worker respondents in low and middle-income countries.

§P-value indicates difference between "Easy" or "Very easy" and "Difficult" or "Very difficult" categories only.

S11 Table. Barriers to implementing a COVID-19 vaccine

|                                                                   | Public Health Workers (PHWs)            |                                                                |           | Healthcare workers (HCWs)                            |                                                               |         |
|-------------------------------------------------------------------|-----------------------------------------|----------------------------------------------------------------|-----------|------------------------------------------------------|---------------------------------------------------------------|---------|
|                                                                   | High-income countries<br>n (%)<br>N=51* | Low and middle-income countries<br>n (%)<br>N=104 <sup>†</sup> | P-value*  | High-income countries<br>n (%)<br>N=25 <sup>**</sup> | Low and middle-income countries<br>n (%)<br>N=42 <sup>¶</sup> | P-value |
| Public fear of vaccine safety                                     | 46 (90)                                 | 81 (78)                                                        | 0.099     | 18 (72)                                              | 28 (67)                                                       | 0.134   |
| Lack of vaccine supply                                            | 39 (77)                                 | 80 (77)                                                        | 1.000     | 16 (64)                                              | 35 (83)                                                       | 0.855   |
| Public fear of vaccine effectiveness                              | 38 (75)                                 | 66 (64)                                                        | 0.233     | 15 (60)                                              | 18 (43)                                                       | 0.269   |
| Lack of public support                                            | 26 (51)                                 | 50 (48)                                                        | 0.866     | 9 (36)                                               | 24 (57)                                                       | 0.703   |
| Lack of communication between policy-makers and the public        | 24 (47)                                 | 38 (37)                                                        | 0.279     | 9 (36)                                               | 15 (36)                                                       | 1.000   |
| Socio-cultural beliefs and practices                              | 22 (43)                                 | 60 (58)                                                        | 0.125     | 9 (36)                                               | 11 (26)                                                       | 0.155   |
| Lack of financial support                                         | 20 (39)                                 | 65 (63)                                                        | 0.010     | 7 (28)                                               | 15 (36)                                                       | 0.002   |
| Lack of communication between healthcare providers and the public | 17 (33)                                 | 42 (40)                                                        | 0.501     | 5 (20)                                               | 26 (62)                                                       | 0.567   |
| Lack of equipment (e.g. cold chain)                               | 17 (33)                                 | 49 (47)                                                        | 0.145     | 8 (32)                                               | 18 (43)                                                       | 0.533   |
| Lack of trained staff                                             | 13 (26)                                 | 34 (33)                                                        | 0.465     | 5 (20)                                               | 22 (52)                                                       | 0.024   |
| Lack of policies and guidelines                                   | 12 (24)                                 | 35 (34)                                                        | 0.270     | 4 (16)                                               | 16 (38)                                                       | 0.962   |
| Vaccine is manufactured in another country                        | 10 (20)                                 | 53 (51)                                                        | P < 0.001 | 1 (4)                                                | 11 (26)                                                       | 0.018   |
| Other                                                             | 6 (12)                                  | 4 (4)                                                          | -         | 1 (4)                                                | 6 (14)                                                        | -       |
| Social stigma                                                     | 5 (10)                                  | 28 (27)                                                        | 0.025     | 2 (8)                                                | 1 (2)                                                         | 0.244   |
| Don't know                                                        | -                                       | 2 (2)                                                          | -         | -                                                    | 1 (2)                                                         | -       |

\*Denominator is the total number of public health worker respondents in high-income countries.

<sup>†</sup>Denominator is the total number of public health worker respondents in low and middle-income countries.

<sup>\*\*</sup>Denominator is the total number of healthcare worker respondents in high-income countries.

<sup>¶</sup>Denominator is the total number of healthcare worker respondents in low and middle-income countries.
